# Supplementary material for: Inhibition of KRAS -Driven Tumorigenicity by Interruption of an Autocrine Cytokine Circuit
Source: Oxford University Press journal article supplement (doi:10.1158/2159-8290.cd-13-0646), 2014-01-20
Supplement: 21598290cd130646-sup-supp_tables.xlsx [file 21598290cd130646-sup-supp_tables.xlsx]

## Sheet: Sheet1
shTBK1 ORF Rescue Screen Results
Rank	Gene_Symbol	Average viability
1	IKBKE	0.509701
2	PTK7	0.488368
3	IRAK4	0.466683
4	RPS6KA2	0.461038
5	ITPKB	0.459977
6	TGFBR1	0.454329
7	PRKAR2A	0.45035
8	MST1R	0.450276
9	WNK4	0.446167
10	DGKK	0.444333
11	ALK	0.441626
12	LOC91461	0.439195
13	TNK1	0.433432
14	DDR1	0.42946
15	NEK5	0.428133
16	FN3K	0.427881
17	RIPK1	0.426573
18	CAMKK2	0.426539
19	CSNK1E	0.425035
20	DAPK3	0.423195
21	EGFR	0.421578
22	CSNK1D	0.418529
23	PFKL	0.409666
24	NEK8	0.407299
25	KDR	0.406339
26	AK7	0.404954
27	PLK4	0.404913
28	TIE1	0.404249
29	BTK	0.403828
30	TLK1	0.401626
31	KSR	0.401131
32	EEF2K	0.401091
33	PIK3R5	0.400875
34	ZAP70	0.398219
35	HIPK2	0.397755
36	CAMK1G	0.394401
37	CDK7	0.39358
38	HK3	0.392621
39	TYK2	0.392294
40	PLK2	0.391396
41	JAK3	0.389605
42	ERBB3	0.388898
43	NAGK	0.387623
44	FER	0.386956
45	JAK1	0.385017
46	BMP2K	0.383246
47	TEC	0.383063
48	TP53RK	0.381972
49	PFKM	0.381648
50	ABL2	0.380846
51	CHEK1	0.380128
52	CLK1	0.379178
53	CKB	0.379167
54	TSSK1	0.378276
55	BRSK2	0.377442
56	NEK10	0.376128
57	SCYL3	0.375786
58	FLT1	0.374975
59	HK1	0.374792
60	PANK4	0.373342
61	ERN1	0.372658
62	MAP2K5	0.372385
63	SYK	0.372334
64	EPHB6	0.372199
65	ALPK1	0.371234
66	LMTK2	0.371047
67	PKM2	0.370948
68	MET	0.370612
69	PRKAG2	0.370188
70	FUK	0.36941
71	AK3	0.36895
72	BUB1	0.368844
73	EPHA1	0.367852
74	MARK3	0.36695
75	FLT4	0.365819
76	PRKG2	0.365639
77	AURKC	0.364694
78	STK32B	0.364478
79	MAP4K5	0.363829
80	MAP2K1	0.363514
81	TSSK6	0.363231
82	FGFR1	0.362901
83	CSF1R	0.3625
84	AK1	0.362064
85	CDK8	0.362002
86	CSNK1A1L	0.361346
87	PINK1	0.36058
88	CAMK2G	0.359686
89	CDKL3	0.359485
90	PAK1	0.358945
91	DAPK1	0.358023
92	INSRR	0.357677
93	PDK1	0.357174
94	PANK3	0.356538
95	ADPGK	0.354124
96	MERTK	0.353759
97	CAMK2A	0.353053
98	ETNK2	0.352973
99	PHKB	0.351936
100	PDIK1L	0.350493
101	PIK3CG	0.349358
102	FASTKD5	0.349098
103	CAMK2D	0.347875
104	CARKL	0.347773
105	BMPR2	0.347451
106	SRPK2	0.347407
107	CAMK4	0.346937
108	ADRBK2	0.346357
109	CSNK1G1	0.346304
110	NEK6	0.346274
111	PMVK	0.345531
112	BRSK1	0.345168
113	PCTK1	0.344929
114	MAP3K8	0.344118
115	ALPK2	0.343942
116	HK2	0.343097
117	ALDH18A1	0.342897
118	PLXNA3	0.342665
119	MPP7	0.342206
120	FGFR3	0.341586
121	DCAMKL2	0.341097
122	MAP2K7	0.340949
123	CDKL2	0.339686
124	DGKZ	0.339178
125	PCK2	0.337731
126	MAP3K12	0.337707
127	PRKCQ	0.337533
128	TXK	0.336812
129	SPHK1	0.336431
130	ERBB2	0.336299
131	PAPSS2	0.335846
132	NME1	0.33572
133	CKMT2	0.335031
134	MPP1	0.334127
135	BMP2KL	0.333744
136	LOC220686	0.333614
137	MAP3K11	0.333498
138	MAPK8	0.333494
139	MYO3B	0.33255
140	SCYL2	0.332506
141	PNKP	0.332073
142	PIK3CA	0.332027
143	BRD3	0.331813
144	MYLK2	0.331148
145	NPR2	0.330673
146	PIK3C2G	0.330642
147	TGFBR3	0.330599
148	EPHA4	0.330487
149	MAPK13	0.330477
150	GALK2	0.32921
151	FES	0.327928
152	MAP4K2	0.327418
153	MAPK4	0.327313
154	CDC7	0.327089
155	PRKCB1	0.326784
156	PHKG1	0.326673
157	BCKDK	0.326412
158	ROR2	0.326359
159	LATS1	0.326023
160	AGK	0.325954
161	UHMK1	0.325835
162	CALM2	0.325655
163	MVK	0.325649
164	FLT3	0.325501
165	TLK2	0.325408
166	C9orf98	0.324929
167	FASTKD3	0.324909
168	PIK3R4	0.324731
169	NEK9	0.324665
170	SPHK2	0.324542
171	BMX	0.324515
172	RIOK1	0.324494
173	DKFZp761P0423	0.324375
174	EPHA3	0.324369
175	RIOK3	0.324143
176	ARSG	0.323973
177	LOC390877	0.323923
178	PIK3R1	0.323474
179	LOC340156	0.323465
180	MAP4K4	0.322772
181	PIP5K1A	0.32263
182	IHPK2	0.322267
183	NME5	0.322045
184	NEK11	0.321956
185	AXL	0.321939
186	ABL1	0.321839
187	PLK1	0.321738
188	RPS6KA4	0.321692
189	STK24	0.321483
190	PRKACB	0.321293
191	ITGB1BP3	0.32119
192	TSSK2	0.320828
193	ULK2	0.320491
194	MAST1	0.320212
195	RPS6KA1	0.319736
196	CABC1	0.319289
197	CDK6	0.319128
198	PIK3C3	0.318966
199	MASTL	0.318879
200	ERBB4	0.318173
201	TYRO3	0.318144
202	STK40	0.318086
203	MPP3	0.317445
204	GNE	0.31707
205	ILK	0.316822
206	PAK4	0.316444
207	FN3KRP	0.316336
208	ARAF	0.316313
209	PIK4CA	0.316082
210	PRKCA	0.315857
211	RIOK2	0.315658
212	PFKP	0.31519
213	AKT1	0.314787
214	PIP5K3	0.314539
215	CDC42BPG	0.31422
216	NTRK2	0.313799
217	PIK3CB	0.313339
218	MAGI1	0.313009
219	PIK3R3	0.311927
220	LOC652799	0.311737
221	EXOSC10	0.311333
222	PHKA2	0.311324
223	PI4KII	0.311028
224	PBK	0.310746
225	TTK	0.310478
226	DLG1	0.310467
227	LOC54103	0.31027
228	MUSK	0.309868
229	PRKAA2	0.309425
230	STK3	0.308925
231	TXNDC3	0.30886
232	PAK3	0.308829
233	RPS6KA5	0.308728
234	ADRBK1	0.307991
235	CASK	0.307389
236	ASCIZ	0.30727
237	LRPPRC	0.307083
238	TRIB1	0.306992
239	PTK6	0.3068
240	TPK1	0.306158
241	RIPK5	0.305894
242	MAP3K5	0.305691
243	EPHA2	0.305484
244	PTK2B	0.304429
245	PRPF4B	0.304089
246	PSKH1	0.304053
247	DCAKD	0.304029
248	LOC389599	0.30325
249	SEPHS2	0.303052
250	TRIM27	0.303046
251	MAPKAPK3	0.302921
252	CDK4	0.302897
253	GSK3A	0.302613
254	COASY	0.302593
255	MKNK1	0.302165
256	FLJ25006	0.302122
257	PRKAR2B	0.302033
258	CDK9	0.301514
259	DAK	0.301307
260	LRGUK	0.301293
261	SRPK1	0.300898
262	XYLB	0.300765
263	PRKG1	0.300588
264	KHK	0.300433
265	CDC2L2	0.300261
266	BRD4	0.300085
267	PDXK	0.299993
268	ACVR2A	0.299628
269	MAPK9	0.299366
270	KIAA2002	0.299309
271	CSNK2A1	0.299281
272	PDK4	0.299261
273	ACVR1C	0.299194
274	PRKX	0.299081
275	SNX16	0.298726
276	MAPK15	0.298601
277	MPP2	0.298475
278	TPR	0.298337
279	NTRK3	0.298318
280	MAP4K1	0.298094
281	GRK7	0.298049
282	SGK3	0.297989
283	TNNI3K	0.297215
284	KSR2	0.296976
285	CALM3	0.296485
286	PTK2	0.296339
287	DGKG	0.2962
288	DDR2	0.295684
289	STK38	0.295678
290	CDC2L6	0.295605
291	RPS6KA6	0.295584
292	CALM1	0.295476
293	MPP5	0.295417
294	PAPSS1	0.295132
295	VRK1	0.295084
296	PDK2	0.295039
297	PGK2	0.294964
298	FASTKD2	0.294794
299	C1orf57	0.294712
300	GCK	0.294572
301	PRKCH	0.294289
302	GLYCTK	0.294234
303	MAP3K6	0.294216
304	ACVR1B	0.294214
305	VRK3	0.293896
306	TAOK3	0.293748
307	LOC730000	0.293657
308	RPS6KA3	0.293599
309	HKDC1	0.293547
310	JAK2	0.293539
311	PRKD1	0.292989
312	COL4A3BP	0.292927
313	LOC648152	0.29154
314	MPP4	0.291416
315	LOC340371	0.291251
316	CSNK1G3	0.290886
317	CARD11	0.290423
318	PTK9	0.290381
319	IRAK2	0.290373
320	CSNK1G2	0.290265
321	LATS2	0.290146
322	MGC42105	0.290081
323	CSNK1A1	0.289692
324	PFKFB3	0.289627
325	PDPK1	0.289622
326	DAPK2	0.289472
327	DYRK2	0.288728
328	MAP2K6	0.28871
329	LOC91807	0.288311
330	PKLR	0.288272
331	PLXNB2	0.288122
332	PHKA1	0.287453
333	EPHB1	0.28737
334	PFTK1	0.287202
335	RPS6KC1	0.287116
336	NME4	0.287018
337	RPS6KB2	0.286995
338	SRPK3	0.28697
339	IGF1R	0.286412
340	CDKL1	0.286342
341	MAP4K3	0.286259
342	NME7	0.286133
343	STK11	0.285662
344	STK25	0.284947
345	HIPK3	0.284862
346	MAK	0.284854
347	BRAF	0.284768
348	PRPS2	0.284239
349	CAMK2B	0.283457
350	UCK2	0.283154
351	BMPR1B	0.282862
352	MAPK14	0.282852
353	SNRK	0.282741
354	CAMKV	0.282618
355	STK36	0.282615
356	FASTKD1	0.281783
357	CKM	0.281768
358	GSG2	0.280361
359	AURKB	0.279655
360	SH3BP4	0.279376
361	ADCK2	0.279033
362	NEK3	0.27828
363	NME1-NME2	0.277888
364	NME2	0.27767
365	GUK1	0.277598
366	MARK2	0.277473
367	NUP62	0.277387
368	MINK1	0.277298
369	FYN	0.27709
370	TWF2	0.277037
371	PRKCG	0.276773
372	PRKAR1A	0.276552
373	PRKD2	0.275733
374	PRKR	0.275319
375	LOC653052	0.27528
376	MOS	0.275115
377	ITK	0.275079
378	IRAK3	0.274724
379	PAK6	0.2744
380	RET	0.274269
381	STK19	0.27395
382	MAP3K7	0.273906
383	CDKL5	0.27303
384	NEK7	0.272985
385	TRIB3	0.272847
386	DGKB	0.272374
387	GALK1	0.2723
388	BMPR1A	0.272178
389	DYRK3	0.272071
390	CDK5R1	0.271606
391	NEK4	0.271169
392	LOC652722	0.270943
393	XRCC6BP1	0.27084
394	PFKFB2	0.270069
395	PRKAG3	0.269844
396	TGFBR2	0.269572
397	FXN	0.269522
398	PIP5K2C	0.268987
399	PNCK	0.267821
400	MORN2	0.26724
401	PDGFRA	0.267194
402	FASTK	0.266453
403	TK1	0.266019
404	FRK	0.265896
405	PRKAA1	0.2657
406	STK32A	0.265677
407	NEK2	0.265615
408	PRKACA	0.265526
409	DCK	0.265133
410	CLK3	0.264609
411	ACVRL1	0.264377
412	MAP3K14	0.264205
413	FLJ23356	0.264172
414	LOC375133	0.26337
415	AAK1	0.263137
416	CDKL4	0.262688
417	PIK4CB	0.26239
418	EPHA6	0.262285
419	SGK2	0.262044
420	KIAA0999	0.262017
421	CSNK2B	0.261814
422	IPMK	0.261713
423	YES1	0.261661
424	RAGE	0.26159
425	PAK2	0.261511
426	RPS6KL1	0.261136
427	CDC2L1	0.261119
428	BUB1B	0.260668
429	GK2	0.260668
430	LIMK1	0.260637
431	CHKA	0.260434
432	SNF1LK	0.260122
433	LIMK2	0.260019
434	CDK3	0.259834
435	PXK	0.259604
436	PAK7	0.259489
437	VRK2	0.259381
438	PLAU	0.258676
439	PRKD3	0.25855
440	AMHR2	0.25839
441	PIP5K1B	0.258343
442	IHPK3	0.256959
443	PFKFB1	0.256936
444	TBK1	0.25691
445	DLG3	0.25645
446	MAPK12	0.255734
447	CHEK2	0.255661
448	TSSK3	0.255509
449	LOC442075	0.254988
450	PDGFRB	0.25459
451	NLK	0.254548
452	PRPS1L1	0.253328
453	NADK	0.252673
454	MPP6	0.252493
455	CKS1B	0.252014
456	PRKAR1B	0.251885
457	RBKS	0.251833
458	ETNK1	0.251762
459	CAMK1D	0.251651
460	PKMYT1	0.251246
461	AKT3	0.249875
462	TESK1	0.249367
463	STK38L	0.249118
464	NME6	0.249084
465	EIF2AK4	0.248024
466	FLJ40852	0.247931
467	MGC16169	0.247829
468	AK2	0.247288
469	RP6-213H19.1	0.247066
470	PRKAB2	0.24656
471	PIP5KL1	0.24619
472	ADCK1	0.246083
473	SLAMF6	0.245998
474	SH3BP5L	0.245937
475	LOC647279	0.245806
476	ACVR2B	0.244848
477	ADCK4	0.244736
478	NJMU-R1	0.244422
479	GTF2H1	0.24442
480	PRKCZ	0.243985
481	DGKA	0.243694
482	TESK2	0.243664
483	TRPM7	0.243611
484	CIB4	0.243415
485	HIPK1	0.242651
486	PLXNA4B	0.242315
487	ULK4	0.242031
488	CDC2	0.241656
489	MAPKAPK5	0.241585
490	YSK4	0.241125
491	RFK	0.240877
492	LOC727761	0.240609
493	MATK	0.240266
494	NTRK1	0.240148
495	LOC649288	0.23944
496	PRKACG	0.238245
497	CDK2	0.237647
498	DYRK1A	0.237625
499	WNK1	0.237039
500	LOC653155	0.236907
501	MAPKAPK2	0.23679
502	PI4K2B	0.236497
503	RPS6KB1	0.236397
504	MAP3K15	0.236281
505	CSK	0.236223
506	PRKY	0.234927
507	MAP2K2	0.234428
508	NUAK2	0.23432
509	STK33	0.23415
510	CAMKK1	0.234137
511	PCTK3	0.233978
512	PIP5K2A	0.233583
513	LOC646505	0.23341
514	LOC650122	0.233369
515	CLK2	0.233305
516	AURKA	0.233046
517	CCL2	0.233021
518	GRK6	0.232946
519	BLK	0.232897
520	PRPS1	0.232706
521	LYK5	0.232695
522	PDGFRL	0.231468
523	LOC732306	0.230977
524	EIF2AK1	0.230261
525	MAST2	0.229194
526	STK16	0.228176
527	CDK5	0.228119
528	ULK3	0.227243
529	MKNK2	0.227007
530	DKFZp434B1231	0.226465
531	DTYMK	0.226234
532	PGK1	0.225447
533	ALS2CR7	0.224986
534	SH3BP5	0.224768
535	MAP2K1IP1	0.224703
536	TRIB2	0.224602
537	MAPK10	0.223336
538	NRBP	0.222882
539	CIB1	0.222649
540	PANK2	0.222274
541	RIPK2	0.22226
542	MAP3K2	0.222206
543	AK3L1	0.221295
544	CDK10	0.22101
545	SGK	0.22067
546	IHPK1	0.220451
547	PRKAB1	0.220219
548	FLJ10986	0.220027
549	BRAFV600E	0.219463
550	IPPK	0.219398
551	STYK1	0.218014
552	PIM2	0.217491
553	CCRK	0.216649
554	LOC388957	0.216495
555	GK5	0.214287
556	CCL4	0.212215
557	FGFRL1	0.211516
558	DYRK4	0.209902
559	PRKAG1	0.209159
560	ZAK	0.208813
561	PDK3	0.208532
562	GK	0.208144
563	LRRK2	0.206787
564	OXSR1	0.206057
565	NYD-SP25	0.205455
566	PCTK2	0.205447
567	CKMT1A	0.204086
568	C9orf95	0.203498
569	CAMK1	0.202585
570	RAF1	0.202043
571	MEKDD	0.200633
572	STK32C	0.200546
573	PRKCE	0.199999
574	PRKCI	0.199584
575	HSPB8	0.198344
576	STK17B	0.196299
577	MAPK3	0.194961
578	MAPK1	0.192278
579	CRKL	0.189977
580	CD2	0.18936
581	PHKG2	0.186273
582	SCYL1	0.186126
583	EPHB4	0.183151
584	NME3	0.179527
585	DGUOK	0.179009
586	FGR	0.176673
587	ACVR1	0.175266
588	SRC	0.174031
589	DYRK1B	0.173765
590	HRASV12	0.172048
591	CKS2	0.171315
592	RP2	0.169913
593	MAPK6	0.164406
594	FGFR2	0.153689
595	LCK	0.149217
596	KRASV12	0.147707
597	PIM1	0.147247
598	LYN	0.0946495
599	HCK	0.0879574
600	HIPK4	0.0877941
601	RKHD3	0.0827746
